# Supplementary material for: Identification of Host PDZ-Based Interactions with the SARS-CoV-2 E Protein in Human Monocytes
Source: MDPI journal article supplement (doi:10.3390/ijms241612793), 2023-08-14
Supplement: s1 [file s1]

# Avila-Flores et al., Supplementary material

Supplemental Table 1 Protein interactors classified by biological process

| Leukocyte degranulation | Myeloid cell activation in immune response | Immune response                               | Neutrophil activation involved in immune response | Neutrophil degranulation | Exocytosis | Secretion | Protein targeting to membrane | Cotranslational protein targeting to membrane | Establishment of protein localization to endoplasmic reticulum | Translational initiation                                                      | Viral process                                                              | Viral transcription                                                     |
|-------------------------|--------------------------------------------|-----------------------------------------------|---------------------------------------------------|--------------------------|------------|-----------|-------------------------------|-----------------------------------------------|----------------------------------------------------------------|-------------------------------------------------------------------------------|----------------------------------------------------------------------------|-------------------------------------------------------------------------|
| ANO6                    | ANO6                                       | ANKHD1<br>ANO6<br>ATP6V0A2                    | ANO6                                              | ANO6                     | ANO6       | ANO6      |                               |                                               |                                                                | ABCF1<br>EIF1<br>EIF2B3<br>CD55<br>EIF3M<br>CHMP1A<br>DHX58<br>DOCK2<br>EIF3M | C1QBP<br>CALCOCO2<br>CD55<br>CDK5RAP3<br>CHMP1A<br>DHX58<br>DOCK2<br>EIF3M |                                                                         |
| BST1                    | BST1                                       | BCL2<br>BST1<br>C11orf62<br>C1QBP<br>CALCOCO2 | BST1                                              | BST1                     | BST1       | BST1      |                               |                                               |                                                                | EIF4E2<br>EIF4G3                                                              |                                                                            |                                                                         |
| CAND1                   | CAND1                                      | CAND1<br>CCR1                                 | CAND1                                             | CAND1                    | CAND1      | CAND1     | EXOC4<br>GOLGA7               |                                               |                                                                | LARP1                                                                         | ELMO1<br>F11R                                                              |                                                                         |
| CD44                    | CD44                                       | CD44                                          | CD44                                              | CD44                     | CD44       | CD44      | RABGEF1                       |                                               | RAB3GAP1                                                       |                                                                               | F11R                                                                       |                                                                         |
| CD55                    | CD55                                       | CD55                                          | CD55                                              | CD55                     | CD55       | CD55      | RPL10<br>RPL10A               | RPL10<br>RPL10A                               | RPL10<br>RPL10A                                                | RPL10<br>RPL10A                                                               | IL16<br>ITCH                                                               |                                                                         |
| CSNK2B                  | CSNK2B                                     | CSNK2B                                        | CSNK2B                                            | CSNK2B                   | CSNK2B     | CSNK2B    | RPL18A                        | RPL18A                                        | RPL18A                                                         | RPL18A                                                                        | ITGAL                                                                      |                                                                         |
| CSTB                    | CSTB                                       | CSTB                                          | CSTB                                              | CSTB                     | CSTB       | CSTB      | RPL28                         | RPL28                                         | RPL28                                                          | RPL28                                                                         | KPNAB                                                                      |                                                                         |
| CYFIP1                  | CYFIP1                                     | CYFIP1                                        | CYFIP1                                            | CYFIP1                   | CYFIP1     | CYFIP1    | RPL39                         | RPL39                                         | RPL39                                                          | RPL39                                                                         | LYN                                                                        |                                                                         |
| DIAPH1                  | DIAPH1                                     | DIAPH1                                        | DIAPH1                                            | DIAPH1                   | DIAPH1     | DIAPH1    | RPL4<br>RPL9                  | RPL4<br>RPL9                                  | RPL4<br>RPL9                                                   | RPL4<br>RPL9                                                                  | MOV10<br>NUP92                                                             |                                                                         |
| DOCK2                   | DOCK2                                      | DOCK2                                         | DOCK2                                             | DOCK2                    | DOCK2      | DOCK2     | RPL1                          | RPL1                                          | RPL1                                                           | RPL1                                                                          | NUP98                                                                      | NUP98                                                                   |
|                         |                                            | EXOSC3                                        |                                                   |                          |            |           | EXOC4                         |                                               |                                                                |                                                                               | PHB2<br>PIKA                                                               |                                                                         |
| GOLGA7                  | GOLGA7                                     | GOLGA7                                        | GOLGA7                                            | GOLGA7                   | GOLGA7     | GOLGA7    | RPS15<br>RPS24                | RPS15<br>RPS24                                | RPS15<br>RPS24                                                 | RPS15<br>RPS24                                                                | PML                                                                        |                                                                         |
| HCK                     | HCK                                        | HCK                                           | HCK                                               | HCK                      | HCK        | HCK       | RPS29                         | RPS29                                         | RPS29                                                          | RPS29                                                                         | PTBP1                                                                      |                                                                         |
| HVCN1                   | HVCN1                                      | HVCN1                                         | HVCN1                                             | HVCN1                    | HVCN1      | HVCN1     | RPS3A                         | RPS3A                                         | RPS3A                                                          | RPS3A                                                                         | RAE1                                                                       | RAE1                                                                    |
| IGF2R                   | IGF2R                                      | IGF2R                                         | IGF2R                                             | IGF2R                    | IGF2R      | IGF2R     | RPS4X                         | RPS4X                                         | RPS4X                                                          | RPS4X                                                                         | RPL10<br>RPL10A<br>RPL18A                                                  | RPL10<br>RPL10A<br>RPL18A                                               |
|                         |                                            | IL16<br>ITCH                                  |                                                   |                          |            |           | SDCBP                         |                                               |                                                                |                                                                               | RPL28<br>RPL39                                                             | RPL28<br>RPL39                                                          |
| ITGAL                   | ITGAL                                      | ITGAL                                         | ITGAL                                             | ITGAL                    | ITGAL      | ITGAL     | SEC81A1                       | SEC81A1                                       | SEC81A1                                                        | SEC83                                                                         | RPL4<br>RPL9<br>RPL1                                                       | RPL4<br>RPL9<br>RPL1                                                    |
| LAMTOR1                 | LAMTOR1                                    | LAMTOR1                                       | LAMTOR1                                           | LAMTOR1                  | LAMTOR1    | LAMTOR1   | SEC63                         | SEC63                                         | SEC63                                                          |                                                                               | RPS15<br>RPS24<br>RPS29<br>RPS3A<br>RPS4X<br>RPS8                          | RPS15<br>RPS24<br>RPS29<br>RPS3A<br>RPS4X<br>RPS8                       |
| LYN                     | LYN                                        | LYN                                           |                                                   |                          | LYN        | LYN       | SRPR                          | SRPR                                          |                                                                |                                                                               | SCRIB<br>SF3B2<br>SND1<br>SSRP1                                            | SCRIB<br>SF3B2<br>SND1<br>SSRP1                                         |
| MAGT1                   | MAGT1                                      | MAGT1                                         | MAGT1                                             | MAGT1                    | MAGT1      | MAGT1     | SSR1                          | SSR1                                          |                                                                |                                                                               | STAT2<br>STAU1                                                             | STAT2<br>STAU1                                                          |
|                         |                                            | MEF2C<br>MEFV<br>MGST1<br>MYD88               |                                                   |                          |            |           | 22                            | 18                                            | 18                                                             | 21                                                                            | SYK<br>TAP2<br>TRFC<br>TRIM22<br>USP15<br>USP7<br>VAMPB<br>VTA1<br>XPO5    | SYK<br>TAP2<br>TRFC<br>TRIM22<br>USP15<br>USP7<br>VAMPB<br>VTA1<br>XPO5 |
| NCKAP1L                 | NCKAP1L                                    | NCKAP1L                                       | NCKAP1L                                           | NCKAP1L                  | NCKAP1L    | NCKAP1L   |                               |                                               |                                                                |                                                                               |                                                                            |                                                                         |
|                         |                                            | NONO<br>PARP9<br>PML                          |                                                   |                          |            |           |                               |                                               |                                                                |                                                                               |                                                                            |                                                                         |
| PSMA5                   | PSMA5                                      | PSMA5                                         | PSMA5                                             | PSMA5                    | PSMA5      | PSMA5     |                               |                                               |                                                                |                                                                               |                                                                            |                                                                         |
| PSMD1                   | PSMD1                                      | PSMD1                                         | PSMD1                                             | PSMD1                    | PSMD1      | PSMD1     |                               |                                               |                                                                |                                                                               |                                                                            |                                                                         |
| RAP2B                   | RAP2B                                      | RAP2B                                         | RAP2B                                             | RAP2B                    | RAP2B      | RAP2B     |                               |                                               |                                                                |                                                                               |                                                                            |                                                                         |
|                         |                                            | RBM14<br>RPL39                                |                                                   |                          |            |           |                               |                                               |                                                                |                                                                               |                                                                            |                                                                         |
| SDCBP                   | SDCBP                                      | SDCBP                                         | SDCBP                                             | SDCBP                    | SDCBP      | SDCBP     |                               |                                               |                                                                |                                                                               |                                                                            |                                                                         |
|                         |                                            | SEC81A1<br>SFPQ                               |                                                   |                          |            |           |                               |                                               |                                                                |                                                                               |                                                                            |                                                                         |
| SLC2A5                  | SLC2A5                                     | SLC2A5                                        | SLC2A5                                            | SLC2A5                   | SLC2A5     | SLC2A5    |                               |                                               |                                                                |                                                                               |                                                                            |                                                                         |
|                         |                                            | STAT2<br>STAT6<br>STOM                        |                                                   |                          |            |           |                               |                                               |                                                                |                                                                               |                                                                            |                                                                         |
| STOM                    | STOM                                       | STOM                                          | STOM                                              | STOM                     | STOM       | STOM      |                               |                                               |                                                                |                                                                               |                                                                            |                                                                         |
| STXBP2                  | STXBP2                                     | STXBP2                                        | STXBP2                                            | STXBP2                   | STXBP2     | STXBP2    |                               |                                               |                                                                |                                                                               |                                                                            |                                                                         |
| STXBP3                  | STXBP3                                     | STXBP3                                        | STXBP3                                            | STXBP3                   | STXBP3     | STXBP3    |                               |                                               |                                                                |                                                                               |                                                                            |                                                                         |
| SURF4                   | SURF4                                      | SURF4                                         | SURF4                                             | SURF4                    | SURF4      | SURF4     |                               |                                               |                                                                |                                                                               |                                                                            |                                                                         |
|                         |                                            | SYK<br>TAP2                                   |                                                   |                          |            |           |                               |                                               |                                                                |                                                                               |                                                                            |                                                                         |
| TCIRG1                  | TCIRG1                                     | TCIRG1                                        | TCIRG1                                            | TCIRG1                   | TCIRG1     | TCIRG1    |                               |                                               |                                                                |                                                                               |                                                                            |                                                                         |
|                         |                                            | TMEM30A<br>TMEM63A<br>TOLLIP                  |                                                   |                          |            |           |                               |                                               |                                                                |                                                                               |                                                                            |                                                                         |
| TMEM30A                 | TMEM30A                                    | TMEM30A                                       | TMEM30A                                           | TMEM30A                  | TMEM30A    | TMEM30A   |                               |                                               |                                                                |                                                                               |                                                                            |                                                                         |
| TMEM63A                 | TMEM63A                                    | TMEM63A                                       | TMEM63A                                           | TMEM63A                  | TMEM63A    | TMEM63A   |                               |                                               |                                                                |                                                                               |                                                                            |                                                                         |
| TOLLIP                  | TOLLIP                                     | TOLLIP                                        | TOLLIP                                            | TOLLIP                   | TOLLIP     | TOLLIP    |                               |                                               |                                                                |                                                                               |                                                                            |                                                                         |
| VAMP8                   | VAMP8                                      | VAMP8                                         | VAMP8                                             | VAMP8                    | VAMP8      | VAMP8     |                               |                                               |                                                                |                                                                               |                                                                            |                                                                         |
| VAT1                    | VAT1                                       | VAT1                                          | VAT1                                              | VAT1                     | VAT1       | VAT1      |                               |                                               |                                                                |                                                                               |                                                                            |                                                                         |
| 35                      | 35                                         | 62                                            |                                                   | 34                       | 33         | 47        |                               |                                               |                                                                |                                                                               | 53                                                                         | 17                                                                      |

**Supplemental Table S1. Classification of GFP-SARS-CoV-2 E protein interactors according to GoTERM categories of biological process .** Proteins classified into the distinct GoTERM categories are listed; the total number of proteins is indicated at the bottom. Color assigned to the different GoTERM categories as shown in Figure 3A.



**Supplemental Table S2. Classification of GFP-SARS-CoV-2 E protein interactors according to GoTERM category of cellular compartments.** Proteins classified into the distinct cellular region or cell compartment are listed; the total number of proteins is indicated at the bottom. Color assigned to the different categories is according to Figure 3B.

**A**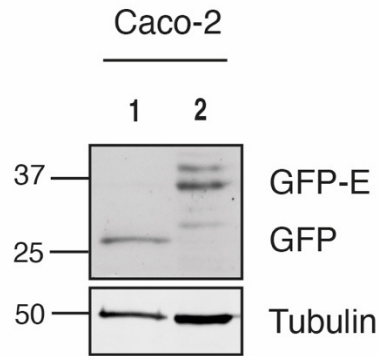**B**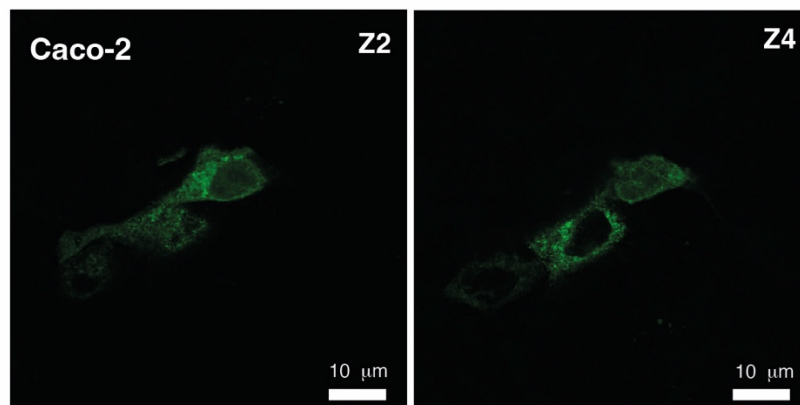

**Supplemental Figure S1. Expression of the recombinant GFP SARS-CoV-2 E protein in Caco-2 cells.** (A) Cells were transfected with either the plasmid pEZYeGFP (empty vector; line 1) or with the pEZYeGFP-SARS-CoV-2 E construct (line 2). After 24 h, cells were lysed and analyzed by Western Blot using anti-GFP and anti-tubulin Abs. (B) Caco-2 cells were seeded into coverslips, transfected with the pEZYeGFP-SARS-CoV-2 E construct and next day fixed and analyzed by confocal microscopy. Two different confocal planes (Z) of a representative transfection are shown.

**A**

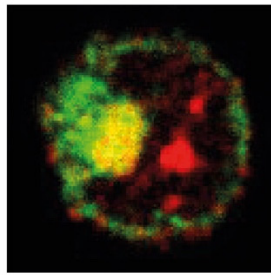

Pearson's coefficient (-1 to 1)  
0.60

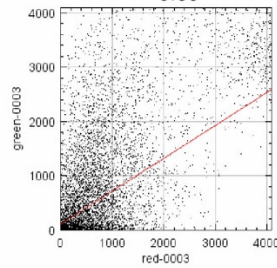

Li's intensity correlation (-0.5 to 0.5)  
0.28

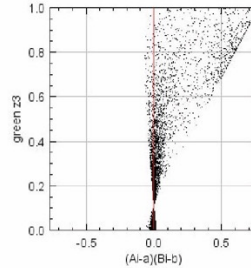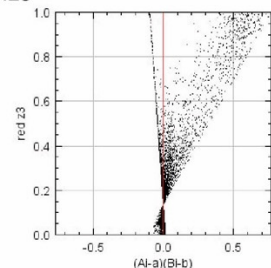

M1 coefficient: fraction of channel A (GFP-E)  
overlapping to channel B (syntenin): 0.609

M2 coefficient: fraction of channel B (syntenin)  
overlapping to channel A (GFP-E): 0.470

**B**

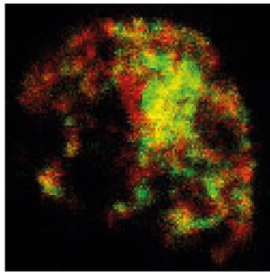

Pearson's coefficient (-1 to 1)  
0.703

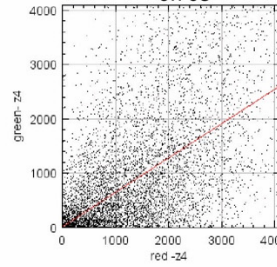

Li's intensity correlation (-0.5 to 0.5)  
0.34

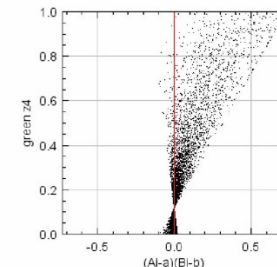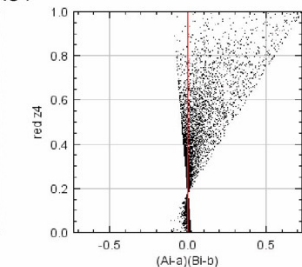

M1 coefficient: fraction of channel A (GFP-E)  
overlapping to channel B (ZO-2): 0.442

M2 coefficient: fraction of channel B (ZO-2)  
overlapping to channel A (GFP-E): 0.796

**C**

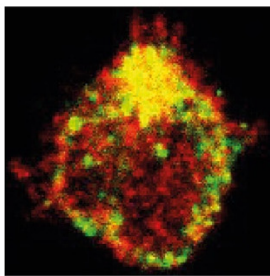

Pearson's coefficient (-1 to 1)  
0.713

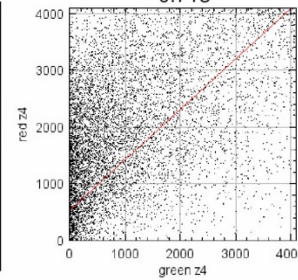

Li's intensity correlation (-0.5 to 0.5)  
0.32

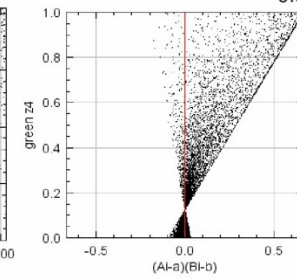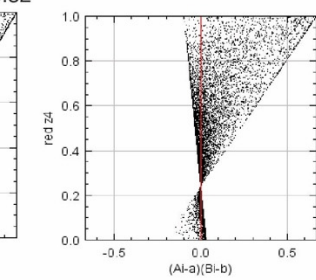

M1 coefficient: fraction of channel A (GFP-E)  
overlapping to channel B (IL-16): 0.650

M2 coefficient: fraction of channel B (IL-16)  
overlapping to channel A (GFP-E): 0.596

**Supplemental Figure S2. GFP-SARS-CoV-2 E protein co-localization with PDZ proteins in THP-1 monocytes.** Representative analysis of the co-localization of the GFP-SARS-CoV-2 E protein with the PDZ proteins (A) syntenin, (B) ZO-2 and (C) IL-16. The images shown were analyzed with the JaCoP plugin. Mander's coefficient was used to determine the concurrence of both proteins, while Pearson's coefficient and Li's intensity correlation were used for analysis of fluorescence intensity correlation.

Mander's coefficient (ranging from 0 to 1) was determined using automatic threshold. M1 corresponds to the fraction of channel A (green; GFP-E) that overlaps with channel B (red; PDZ protein), while M2 corresponds to the fraction of channel B (red; PDZ protein) overlapping with channel A (green; GFP-E). M values are indicated below for each image.

Pearson's coefficient (ranging from -1 to 1) and Li's intensity correlation (ranging from -0.5 to 0.5), were also used. In all the cases the analysis showed partial co-localization since concurrence was restricted to certain cell regions.
